# Supplementary material
Source: PubMed Central journal article supplement (PMC3837933)
Supplement: EC.00139-13_zek999094188so1.pdf [file EC.00139-13_zek999094188so1.pdf]

## Supplemental Material

Amino acid identity (similarity)

|        | GpAMT1    | GpAMT2    | GpAMT3    | GiAMT1    |
|--------|-----------|-----------|-----------|-----------|
| GpAMT2 | 60% (74%) |           |           |           |
| GpAMT3 | 59% (76%) | 63% (78%) |           |           |
| GiAMT1 | 57% (74%) | 61% (77%) | 65% (81%) |           |
| GiAMT2 | 61% (74%) | 58% (74%) | 65% (81%) | 63% (79%) |

**Fig. S1** Comparison of glomeromycotan AMT amino acid sequences. GpAMT1, GpAMT2, GpAMT3, GiAMT1 and GiAMT2 amino acid sequences were analyzed pairwise with the BLAST algorithm and Blosum62 (1), and percentages of identical (similar) amino acids are listed. The comparison of *Geosiphon pyriformis* ammonium transporters is marked in dark grey.

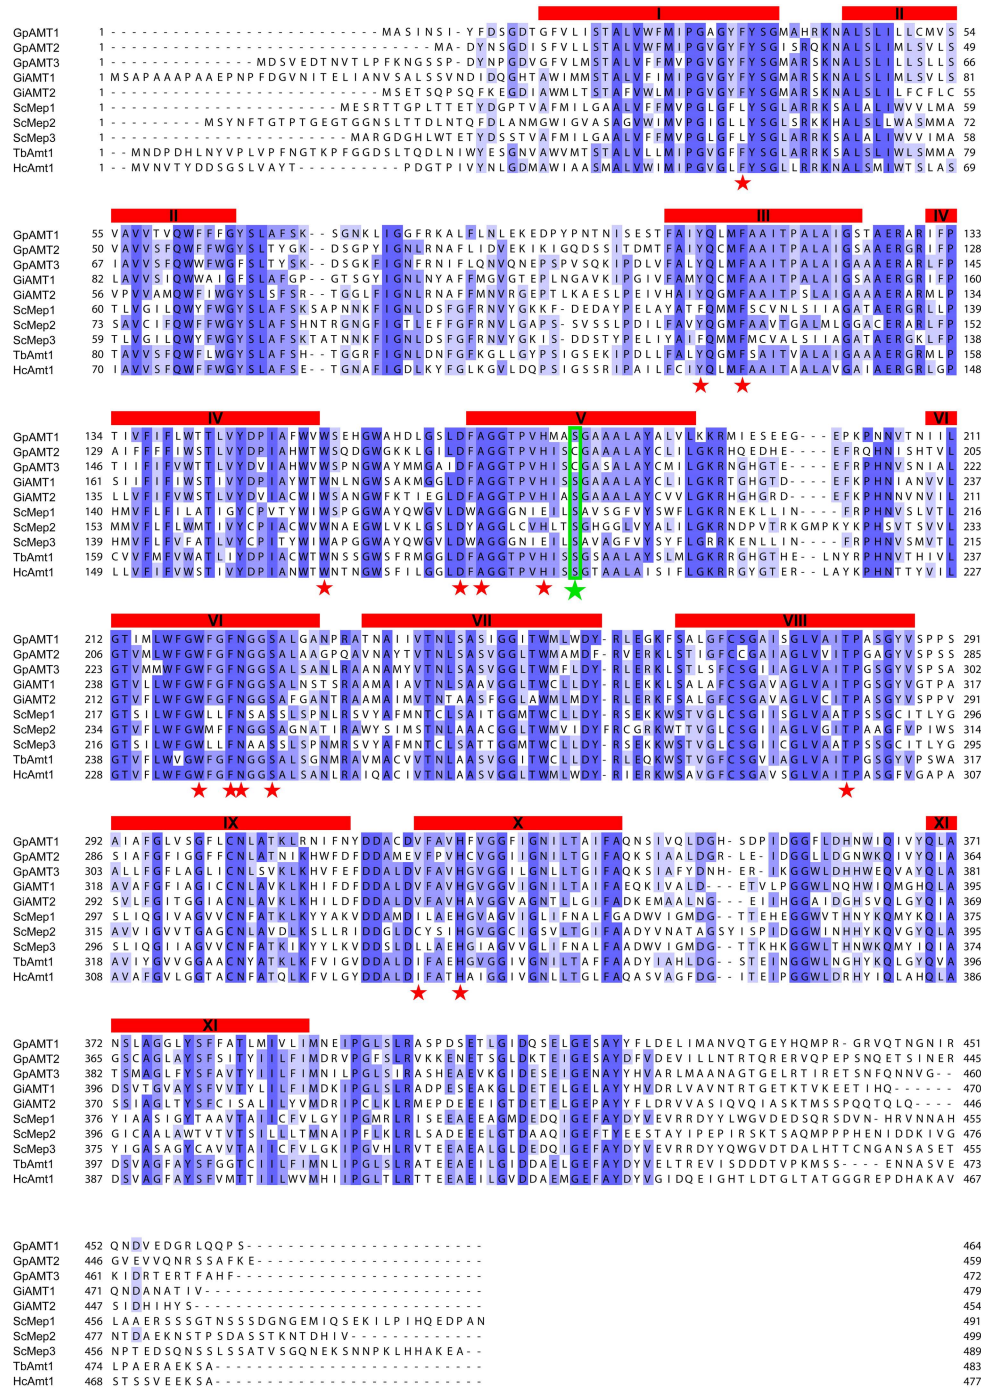

**Fig. S2** Alignment of 10 fungal AMT amino acid sequences. The 14 conserved residues reported to be of functional significance for conducting ammonium through the pore region (2, 3) are marked with red stars. Sequences were obtained from the GenBank database with the following accession numbers: *Geosiphon pyriformis* (GpAMT1, JX535577; GpAMT2, JX535578; GpAMT3, JX535579), *Rhizophagus irregularis* (GiAMT1, CAI54276; GiAMT2, CAX32490), *Saccharomyces cerevisiae* (ScMep1, P40260; ScMep2, P41948; ScMep3, P53390), *Tuber borchii* (TbAmt1, AAL11032), *Hebeloma cylindrosporium* (HcAmt1, AAM21926). Residues shaded in light, medium, and dark blue indicate at least 50%, 70%, and 90% conservation of the 10 sequences, respectively. Red thick lines indicate positions of the 11 transmembrane domains predicted for GpAMT1. Green box and star mark the unusual cysteine residue in GpAMT2 and GpAMT3 located in close proximity to the histidine dyad (see Fig. S5) that plays an important role in ammonium transduction (4).

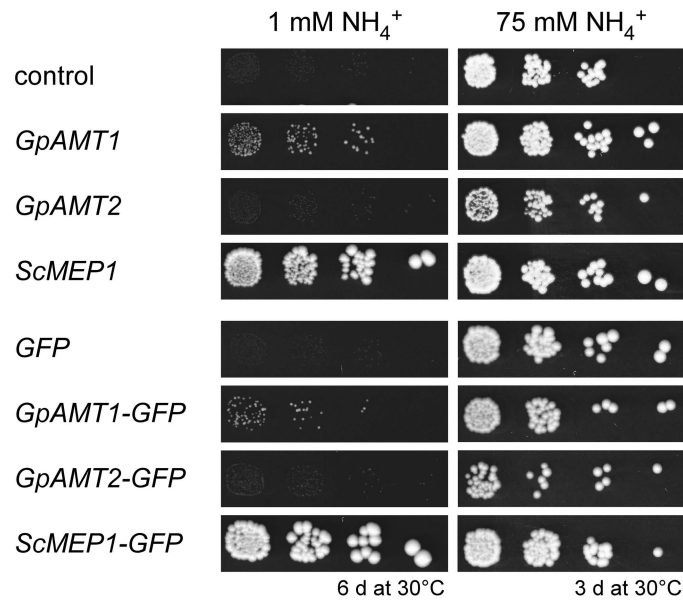

**Fig. S3** Complementation assay of yeast strain MLY131a/α (*mep1-3Δ*). The strain was transformed with the empty vector or *GFP* as negative controls, *ScMEP1* or *ScMEP1-GFP* as positive controls, and the annotated AMT genes or genes encoding AMT-GFP fusion proteins. Strains were cultivated on minimal medium containing 1 mM NH<sub>4</sub><sup>+</sup> as sole nitrogen source or on HC-U medium containing 75 mM NH<sub>4</sub><sup>+</sup>. Note that transformation with GFP-tagged AMTs resulted in the same functional complementation as transformation with untagged versions.

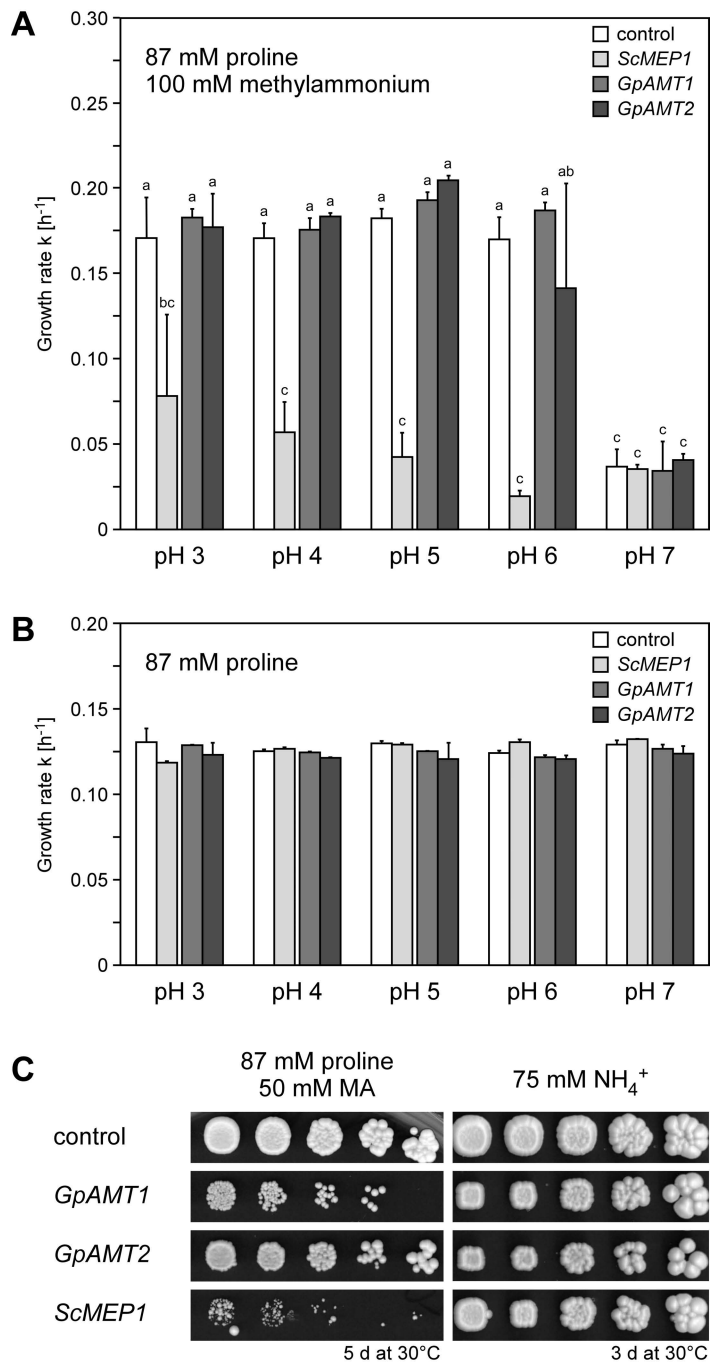

**Fig. S4** Growth assays in the presence of cytotoxic methylammonium (MA). The yeast strain MLY131a/a (*mep1-3Δ*) was transformed with the empty vector (negative control), *ScMEP1* (positive control), *GpAMT1*, or *GpAMT2*. (A) pH dependence of MA uptake and cytotoxicity. Yeast cells were cultivated in buffered liquid medium containing 0.1% proline as nitrogen source and 100 mM MA. At pH values below 7, clear differences between *ScMEP1* expressing yeast and the other strains were observed. At pH 7 passive influx of MA seems to limit growth of all strains. Error bars,  $\pm$ SD; n = 4 biological replicates. Different letters above bars indicate highly significant differences ( $P \leq 0.001$ , ANOVA test) between pairwise comparisons. (B) Growth in buffered liquid medium with 0.1% proline as sole nitrogen source, at pH values of 3-7. Yeast growth was not affected by medium pH. Error bars,  $\pm$ SD; n = 4 biological replicates. (C) Growth on solid minimal medium containing 0.1% proline as nitrogen source and 50 mM MA (left), or on HC-U medium containing 75 mM NH<sub>4</sub><sup>+</sup> (right).

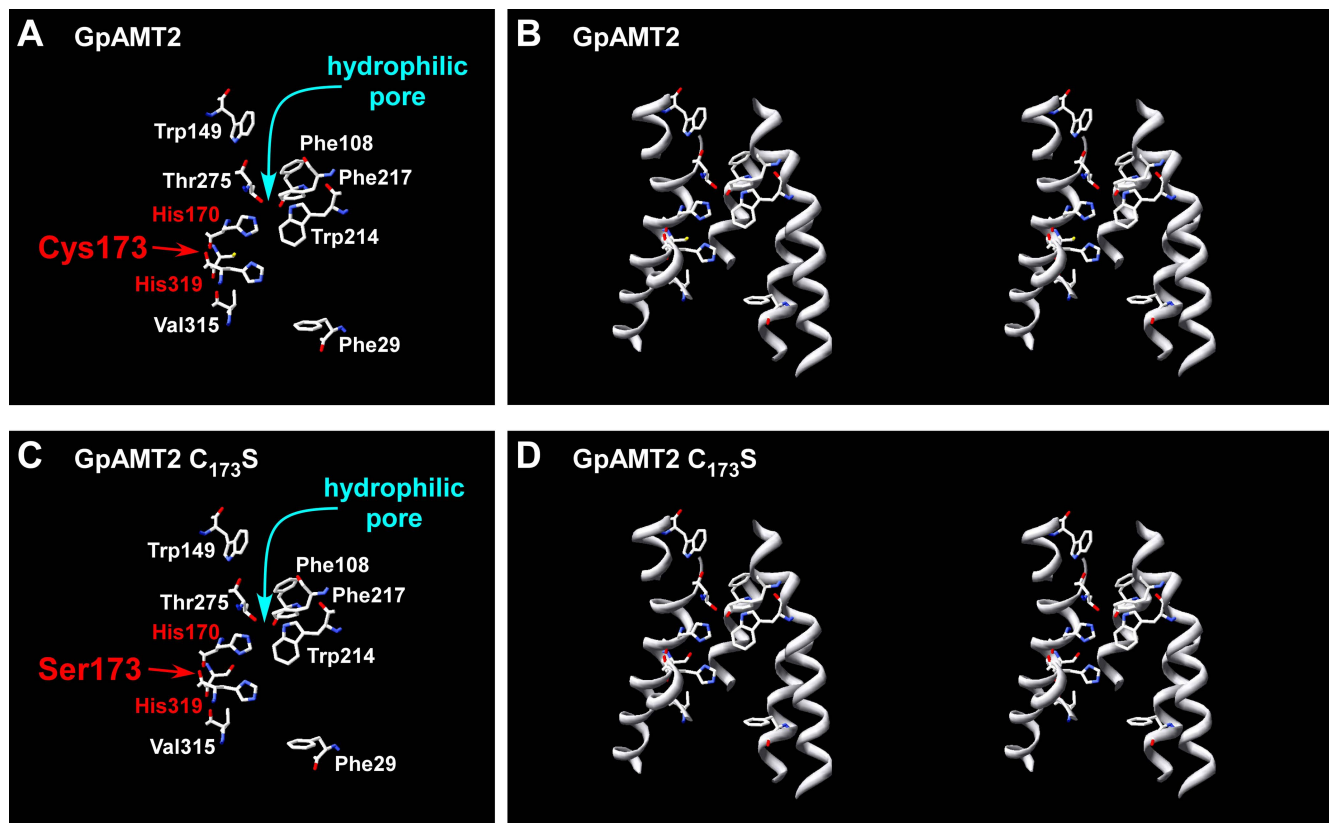

**Fig. S5** Structural model of the hydrophilic pore in GpAMT2. (A,C) Representation of the conserved and functionally important residues inside the hydrophilic pore for ammonium transduction and of cysteine/serine 173. (B,D) Stereo images of the 3D structure of the pore region. Cysteine/serine 173 is located in close proximity to the histidine dyad. Structures of GpAMT2 and GpAMT2 C<sub>173</sub>S were generated using SWISS-MODEL and the PDB template 2b2h of *Archaeoglobus fulgidus* amt-1.

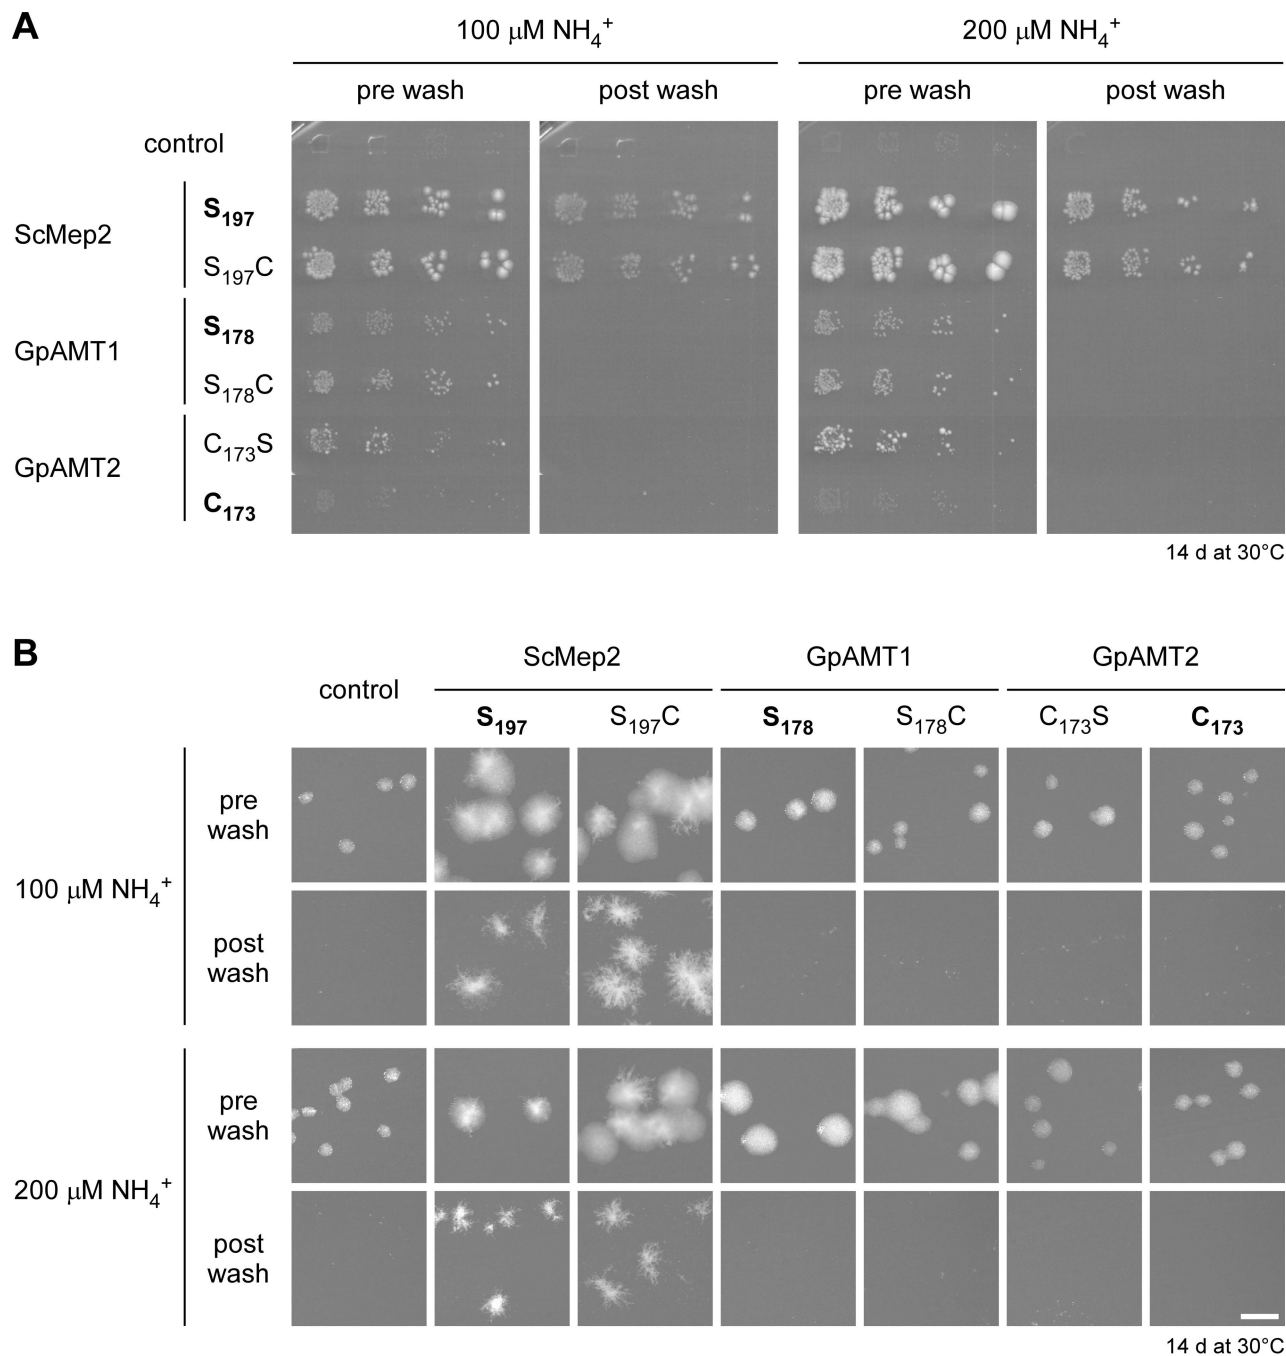

**Fig. S6** Test for invasive pseudohyphal growth on solid medium. The yeast strain MLY131a/a (*mep1-3Δ*) was transformed with the empty vector (negative control), and with vectors expressing wild type and mutant yeast and *Geosiphon pyriformis* AMTs. The respective wild type constructs are indicated in bold. Yeast strains were grown on solid minimal medium with 100  $\mu\text{M}$  or 200  $\mu\text{M}$   $\text{NH}_4^+$  as sole nitrogen source. After 14 days at 30°C colonies were documented and subsequently washed away with water, leaving only invasively growing cells. (A) Photographs of fivefold serial dilutions of the indicated strains. Representative examples from 4 biological replicates are shown. (B) Photographs of colony morphologies were taken directly from Petri plates with a Leica MZ 16 FA stereomicroscope with a 63x primary objective and a 0.8x camera adaptor (bar, 200  $\mu\text{m}$ ). Representative examples from 4 biological replicates are shown. Note that only ScMep2 constructs complement for pseudohyphal growth and that the S<sub>197</sub>C mutation does not interfere with pseudohyphal growth.

**Table S1** Plasmids used in this study.

| <b>Plasmid</b> | <b>Backbone</b> | <b>Insert</b>           | <b>Reference</b> |
|----------------|-----------------|-------------------------|------------------|
| pDR196sfi      | pDR196          | SfiI restriction sites  | (5)              |
| pRU4           |                 | <i>EGFP</i>             | (6)              |
| pBL101         | pDR196sfi       | <i>GpAMT1</i> with UTRs | This study       |
| pBL102         | pDR196sfi       | <i>GpAMT2</i> with UTRs | This study       |
| pBL103         | pDR196sfi       | <i>ScMEP1</i>           | This study       |
| pBL104         | pDR196sfi       | <i>ScMEP2</i>           | This study       |
| pBL106         | pDR196sfi       | <i>GFP</i>              | This study       |
| pBL107         | pDR196sfi       | <i>GpAMT1-GFP</i>       | This study       |
| pBL108         | pDR196sfi       | <i>GpAMT2-GFP</i>       | This study       |
| pBL109         | pDR196sfi       | <i>ScMEP1-GFP</i>       | This study       |
| pBL110         | pDR196sfi       | <i>GpAMT1</i> ORF       | This study       |
| pBL111         | pDR196sfi       | <i>GpAMT2</i> ORF       | This study       |
| pBL130         | pDR196sfi       | <i>GpAMT1_S178C</i>     | This study       |
| pBL131         | pDR196sfi       | <i>GpAMT2_C173S</i>     | This study       |
| pBL134         | pDR196sfi       | <i>ScMEP2_S197C</i>     | This study       |
| pBL151         | pDR196sfi       | <i>GiAMT1</i>           | This study       |
| pBL154         | pDR196sfi       | <i>GiAMT1-GFP</i>       | This study       |
| pBL179         | pDR196sfi       | <i>GpAMT3</i> with UTRs | This study       |
| pBL180         | pDR196sfi       | <i>cGpAMT3</i>          | This study       |
| pBL181         | pDR196sfi       | <i>cGpAMT3_C189S</i>    | This study       |
| pBL183         | pDR196sfi       | <i>gGpAMT3</i>          | This study       |
| pBL185         | pDR196sfi       | <i>gGpAMT3_C189S</i>    | This study       |
| pBL186         | pDR196sfi       | <i>gGpAMT3-GFP</i>      | This study       |

**Table S2** Primers used in this study.

| Primer name                                   | Sequence (5'-3') <sup>a</sup>                            | Application                                |
|-----------------------------------------------|----------------------------------------------------------|--------------------------------------------|
| <b>Primers in vector backbone</b>             |                                                          |                                            |
| ADHclose                                      | AATACGACTCACTATAGG                                       | pDR196sfi backbone, 3' of insertion site   |
| ADH109-REV                                    | CGACTCACTATAGGGCG                                        | Nested to ADHclose                         |
| PMA5                                          | CTCTCTTTTATACACACATTC                                    | pDR196sfi backbone, 5' of insertion site   |
| PMA16                                         | CGGGCTGCAGGAATTCGG                                       | Nested to PMA5                             |
| <b>Cloning of GpyrAMT genes</b>               |                                                          |                                            |
| MEP1-50-FWD                                   | GGTATGTATGATGGCTATTTGTGTTGTTATNYTNCARTGGT                | Degenerate PCR                             |
| MEP1-53-FWD                                   | ATGGCTATTTGTGTTGTTATTTTTCARTGGTWTYT                      | Degenerate PCR                             |
| MEP1-178-REV                                  | AATTTCAACAGGACCACCACCCNGCVHARTC                          | Degenerate PCR                             |
| GpAMT2-FWD1                                   | CATATATTGGCAATTTAAGGAATG                                 | Cloning of <i>GpAMT2</i> 3' end            |
| GpAMT2-FWD2                                   | GGCAATTTAAGGAATGCTTTCC                                   | Nested to GpAMT2-FWD1                      |
| GpAMT2-REV3                                   | CCAAATGCAATAGAAGATGAGG                                   | Cloning of <i>GpAMT2</i> 5' end            |
| GpAMT2-REV5                                   | GGTCTTCTTGATGTCGCTTTCC                                   | Nested to GpAMT2-REV3                      |
| GpAMT3-clone-FWD                              | CGTTGGTTTGGATTTAAGC                                      | Cloning of <i>GpAMT3</i>                   |
| GpAMT3-clone-REV                              | CCCAGCAAGGAAACCAATA                                      | Cloning of <i>GpAMT3</i>                   |
| <b>Cloning of yeast expression constructs</b> |                                                          |                                            |
| GpAMT1-sfi-FWD                                | <u>CAAGGCCATTACGGCCAACATGGCTTCGATAAAATTCGATATATTTCCG</u> | Cloning of <i>GpAMT1</i> CDS               |
| GpAMT1-sfi-REV                                | <u>GATGGCCGAGGCGGCCTTAAAGAGACGGTTGCTGAAGTCT</u>          | Cloning of <i>GpAMT1</i> CDS               |
| GpAMT2-sfi-FWD                                | <u>CCAGGCCATTACGGCCTACAAAATGGGCCGATTATAATTC</u>          | Cloning of <i>GpAMT2</i> CDS               |
| GpAMT2-sfi-REV                                | <u>GATGGCCGAGGCGGCCTTAATTTTCCTTGAAAGCACTCGA</u>          | Cloning of <i>GpAMT2</i> CDS               |
| GpAMT3-sfi-FWD                                | <u>CAAGGCCATTACGGCCAACATGGATTCTGTGGAAGATACGAATG</u>      | Cloning of <i>GpAMT3</i> CDS               |
| GpAMT3-sfi-REV                                | <u>GATGGCCGAGGCGGCCTTAAAAATGAGCAAATGTTCTTTCCG</u>        | Cloning of <i>GpAMT3</i> CDS               |
| GpAMT3-gen-FWD                                | CACAAATGGATTCTGTGGAAGATACG                               | Constructing gDNA variant of <i>GpAMT3</i> |
| GpAMT3-gen-REV                                | CAGAGCACAAAAATTTGCATTATTGCC                              | Constructing gDNA variant of <i>GpAMT3</i> |
| GiAMT1-sfi-FWD                                | <u>CCAGGCCATTACGGCCAACATGTCTGCTCCCGCTGCTGC</u>           | Cloning of <i>GiAMT1</i>                   |
| GiAMT1-sfi-REV                                | <u>CCTAGGCCGAGGCGGCCTTATACAATTTGTCATTTGCGTCATTTTG</u>    | Cloning of <i>GiAMT1</i>                   |
| ScMEP1-sfi-FWD                                | <u>CAAGGCCATTACGGCCTACAAAATGGAGAGTCGAACTAC</u>           | Cloning of <i>ScMEP1</i> CDS               |
| ScMEP1-sfi-REV                                | <u>CCAGGCCGAGGCGGCCTTACCTATTGGCAGGATCTTCTTGATG</u>       | Cloning of <i>ScMEP1</i> CDS               |
| ScMEP2-sfi-FWD                                | <u>CCAGGCCATTACGGCCAACATGTCTTACAATTTTACAGGTACG</u>       | Cloning of <i>ScMEP2</i> cDNA              |
| ScMEP2-sfi-REV                                | <u>CCAGGCCGAGGCGGCCTTATACTATATGGTCAGTGTCTTA</u>          | Cloning of <i>ScMEP2</i> cDNA              |
| <b>Cloning of GFP-tags</b>                    |                                                          |                                            |
| X-S-EGFP-FWD                                  | <u>GGACTCGAGTAACACGGCCGCTCGGCCATGGTGAAGGGCGAGG</u>       | Cloning of <i>GFP</i> into pDR196sfi       |
| EGFP-A-REV                                    | <u>CATGGGCCCTTACTTGTACAGCTCGTCCATGCG</u>                 | Cloning of <i>GFP</i> into pDR196sfi       |
| ORF-FWD                                       | CGGCCTACAAAATGTCGGCCGCCT                                 | Cloning of pBL106 (soluble GFP)            |
| ORF-REV                                       | CGGCCGACATTTTGTAGGCCGTAA                                 | Cloning of pBL106 (soluble GFP)            |
| GpAMT1-tag-sfi-REV                            | <u>GATGGCCGAGGCGGCCGAAAGAGACGGTTGCTGAAGTCT</u>           | Reverse primer for tagging <i>GpAMT1</i>   |
| GpAMT2-tag-sfi-REV                            | <u>GATGGCCAGGCGGCCGAAATTTCTTGAAAGCACTCGA</u>             | Reverse primer for tagging <i>GpAMT2</i>   |
| GpAMT3-tag-sfi-REV                            | <u>CCTAGGCCGAGGCGGCCAAAATGAGCAAATGTTCTTTCCG</u>          | Reverse primer for tagging <i>GpAMT3</i>   |
| ScMEP1-tag-sfi-REV                            | <u>GATGGCCGAGGCGGCCGACCTATTGGCAGGATCTTCTTG</u>           | Reverse primer for tagging <i>ScMEP1</i>   |
| <b>Cloning of CtoS and StoC variants</b>      |                                                          |                                            |
| GpAMT1-StoC-FWD                               | GTTTCATATGGCATGTGGAGCTGCTGCACTCG                         | Mutation S <sub>178</sub> C in GpyrAMT1    |
| GpAMT1-StoC-REV                               | CGAGTGCAGCAGCTCCACATGCCATATGAAC                          | Mutation S <sub>178</sub> C in GpyrAMT1    |
| GpAMT2-CtoS-FWD                               | GTACACATTTCTTCCGGAGCTGCTGTTTAG                           | Mutation C <sub>175</sub> S in GpyrAMT2    |
| GpAMT2-CtoS-REV                               | CTAAGCAGCAGCTCCGGAAGAAATGTGTAC                           | Mutation C <sub>175</sub> S in GpyrAMT2    |
| GpAMT3-CtoS-FWD                               | CTGTTTCATATTTCTTCCGGAGCTTCTGCAC                          | Mutation C <sub>189</sub> S in cGpyrAMT3   |
| GpAMT3-CtoS-REV                               | GTGCAGAAGCTCCGGAAGAAATATGAACAG                           | Mutation C <sub>189</sub> S in cGpyrAMT3   |
| gGpAMT3-CtoS-FWD                              | CTGTTTCATATTTCTTCCGGAGCTGCTGCAC                          | Mutation C <sub>189</sub> S in gGpyrAMT3   |
| gGpAMT3-CtoS-REV                              | GTGCAGCAGCTCCGGAAGAAATATGAACAG                           | Mutation C <sub>189</sub> S in gGpyrAMT3   |
| ScMEP2-StoC-FWD                               | GTGTCCATCTCACGTGTGGACATGGTGGTC                           | Mutation S <sub>197</sub> C in ScMep2      |
| ScMEP2-StoC-REV                               | GACCACCATGTCCACAGTGAGATGGACAC                            | Mutation S <sub>197</sub> C in ScMep2      |

<sup>a</sup> Overhangs are underlined



## Supplemental References

1. **Altschul SF, Gish W, Miller W, Myers EW, Lipman DJ.** 1990. Basic local alignment search tool. *J. Mol. Biol.* **215**:403-410.
2. **Andrade S, Einsle O.** 2007. The Amt/Mep/Rh family of ammonium transport proteins. *Mol. Membr. Biol.* **24**:357-365.
3. **Lamoureux G, Javelle A, Baday S, Wang S, Bernèche S.** 2010. Transport mechanisms in the ammonium transporter family. *Transfus. Clin. Biol.* **17**:168-175.
4. **Wang S, Orabi E, Baday S, Bernèche S, Lamoureux G.** 2012. Ammonium transporters achieve charge transfer by fragmenting their substrate. *J. Am. Chem. Soc.* **134**:10419-10427.
5. **Schübler A, Martin H, Cohen D, Fitz M, Wipf D.** 2006. Characterization of a carbohydrate transporter from symbiotic glomeromycotan fungi. *Nature* **444**:933-936.
6. **Brachmann A, Weinzierl G, Kamper J, Kahmann R.** 2001. Identification of genes in the bW/bE regulatory cascade in *Ustilago maydis*. *Mol. Microbiol.* **42**:1047-1063.
